# Supplementary material for: Strategy for Fast Decision on Material System Suitability for Continuous Crystallization Inside a Slug Flow Crystallizer
Source: MDPI journal article supplement (doi:10.3390/mi13101795), 2022-10-21
Supplement: s1 [file s1]

Supporting Information

# Strategy for Fast Decision on Material System Suitability for Continuous Crystallization Inside a Slug Flow Crystallizer

Anne Cathrine Kufner <sup>1,†</sup>, Adrian Krummnow <sup>2,3,†</sup>, Andreas Danzer <sup>2</sup>, and Kerstin Wohlgemuth <sup>1,\*</sup>

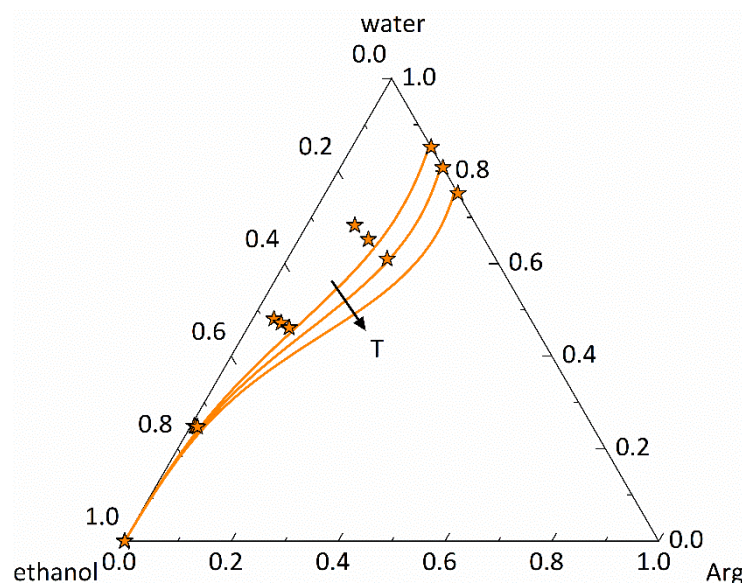

**Figure S1.** Ternary phase diagram of Arg/water/ethanol at 0.1 MPa with compositions given in mass fractions: Solubility lines were predicted in this work using PC-SAFT, and symbols denote solubility measurements performed in this work. The arrow indicates the direction of increasing temperature from 20 °C to 30 °C, and 40 °C.

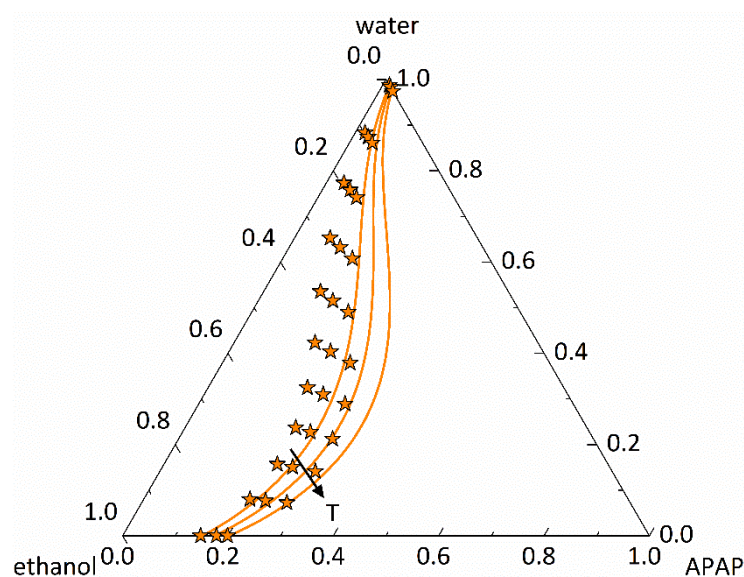

**Figure S2.** Ternary phase diagram of APAP/water/ethanol at 0.1 MPa with compositions given in mass fractions: Solubility lines were predicted in this work using PC-SAFT, and symbols denote solubility measurements from JIMENEZ AND MARTINEZ [62]. The arrow indicates the direction of increasing temperature from 20 °C to 30 °C, and 40 °C.

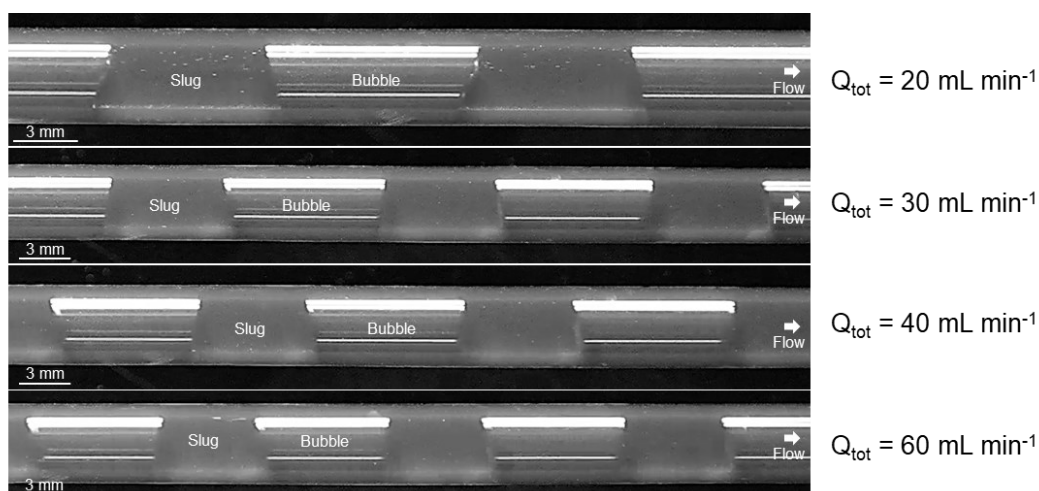

**Figure S3.** Images of water slugs ( $w_{\text{EtOH}} = 0 \%$ ) at the end of tubing ( $L = 7.5 \text{ m}$ ) at different total volume flow rates  $Q_{\text{tot}}$ . The experiments were conducted at ambient temperature ( $\vartheta_{\text{amb}} \approx 22 \text{ }^{\circ}\text{C}$ ).

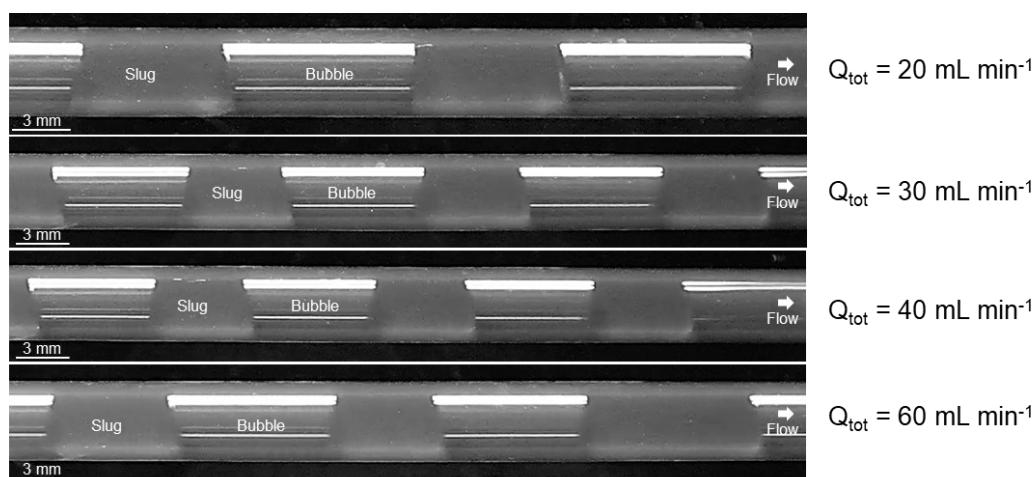

**Figure S4.** Images of slugs ( $w_{\text{EtOH}} = 10 \%$ ) at the end of tubing ( $L = 7.5 \text{ m}$ ) at different total volume flow rates  $Q_{\text{tot}}$ . The experiments were conducted at ambient temperature ( $\vartheta_{\text{amb}} \approx 22 \text{ }^{\circ}\text{C}$ ).

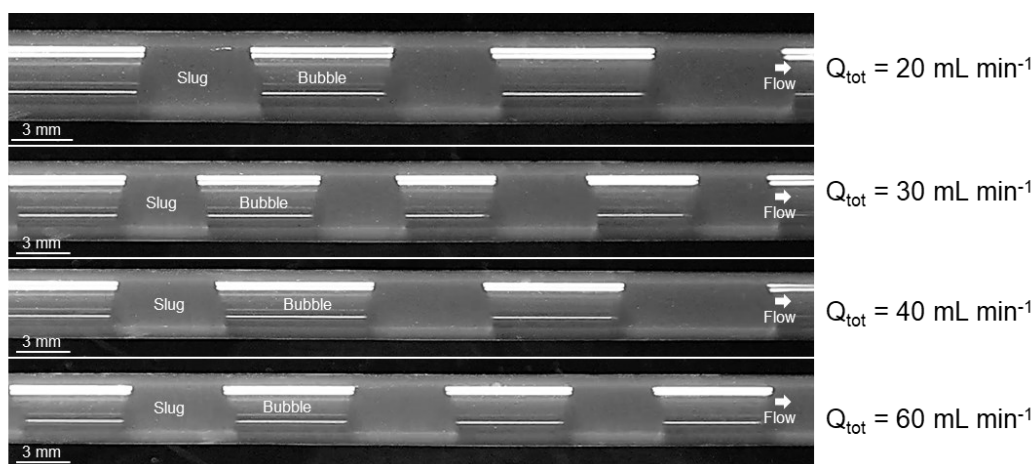

**Figure S5.** Images of slugs ( $w_{\text{EtOH}} = 20 \%$ ) at the end of tubing ( $L = 7.5 \text{ m}$ ) at different total volume flow rates  $Q_{\text{tot}}$ . The experiments were conducted at ambient temperature ( $\vartheta_{\text{amb}} \approx 22 \text{ }^{\circ}\text{C}$ ).

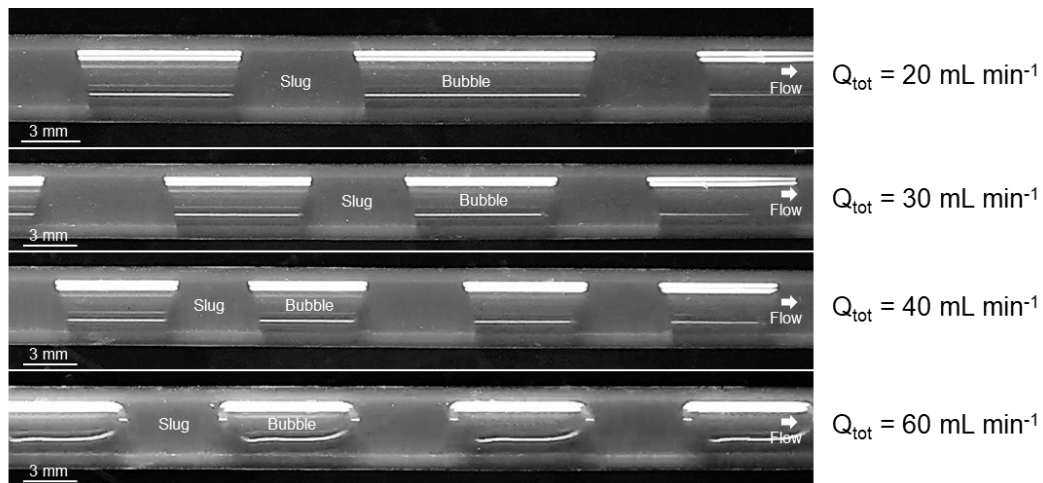

**Figure S6.** Images of slugs ( $w_{\text{EtOH}} = 30 \%$ ) at the end of tubing ( $L = 7.5 \text{ m}$ ) at different total volume flow rates  $Q_{\text{tot}}$ . The experiments were conducted at ambient temperature ( $\vartheta_{\text{amb}} \approx 22 \text{ }^{\circ}\text{C}$ ).

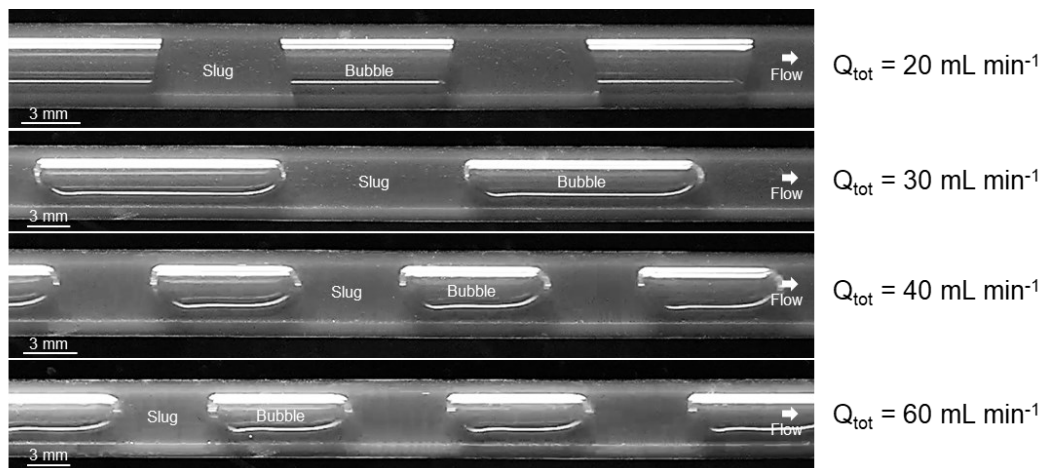

**Figure S7.** Images of slugs ( $w_{\text{EtOH}} = 50 \%$ ) at the end of tubing ( $L = 7.5 \text{ m}$ ) at different total volume flow rates  $Q_{\text{tot}}$ . The experiments were conducted at ambient temperature ( $\vartheta_{\text{amb}} \approx 22 \text{ }^{\circ}\text{C}$ ).
